# Supplementary material
Source: publisher figshare collection journal article supplement (https://asha.figshare.com/ndownloader/files/38698419)
Supplement: Supplementary file 1 [file 38698419]

Supplemental material, Zapparrata et al., "Developmental Language Disorder Is Associated With Slower Processing Across Domains: A Meta-Analysis of Time-Based Tasks," JSLHR, https://doi.org/10.1044/2022_JSLHR-22-00221
Supplemental Material S3. The full data set, with outliers included, is the data set that is read into and described in the R script for analysis.
Study_info	study_id	Task_Group	Auditory_1	Ling_1	Verbal_1	N_SLI	N_Control	Age_SLI	Year of Publication	Mean_SLI	Mean_control	SD_SLI	SD_control
Ladányi & Lukács (2019)	1	3	0	1	0	30	30	8.917	2019	1223	1164	221	241
Ladányi & Lukács (2019)	1	2	0	0	1	30	30	8.917	2019	51	47	13	14
Ladányi & Lukács (2019)	1	2	0	0	1	28	28	8.917	2019	360	229	84	67
Ladányi & Lukács (2019)	1	2	0	1	1	30	30	8.917	2019	39	35	22	13
Ladányi & Lukács (2019)	1	2	0	1	1	26	26	8.917	2019	33	35	10	14
Edwards & Lahey (1996)	2	0	1	0	1	46	46	7.25	1996	493	467	165	123
Edwards & Lahey (1996)	2	0	1	0	1	46	46	7.25	1996	528	446	252	135
Edwards & Lahey (1996)	2	1	1	1	1	46	46	7.25	1996	927	732	330	220
Lahey & Edwards (1996)	2	0	0	0	1	66	66	6.75	1996	609.34	504.52	236	162
Lahey & Edwards (1996)	2	3	0	0	1	58	58	6.75	1996	870.64	713.06	348	208
Lahey & Edwards (1996)	2	3	0	0	1	58	58	6.75	1996	842.71	706.12	380	285
Lahey & Edwards (1996)	2	3	0	0	1	58	58	6.75	1996	768.84	654.56	339	244
Lahey & Edwards (1996)	2	0	1	0	1	66	66	6.75	1996	583.22	490.4	247	152
Lahey & Edwards (1996)	2	2	1	0	1	61	61	6.75	1996	1203.9	1094.01	301	257
Lahey & Edwards (1996)	2	2	1	0	1	61	61	6.75	1996	954.91	864.73	223	334
Lahey & Edwards (1996)	2	2	1	0	1	61	61	6.75	1996	807.88	694.41	286	256
Lahey & Edwards (1996)	2	2	1	0	1	61	61	6.75	1996	758.84	651.83	236	220
Lahey & Edwards (1996)	2	2	1	0	1	61	61	6.75	1996	722.23	592.4	301	238
Lahey & Edwards (1996)	2	2	1	0	1	61	61	6.75	1996	668.18	561.82	263	175
Lahey & Edwards (1996)	2	2	1	0	1	61	61	6.75	1996	641.78	549.47	237	166
Lahey & Edwards (1996)	2	2	1	0	1	61	61	6.75	1996	675.32	558.57	320	247
Leonard et al. (1983)	3	2	0	0	1	20	20	NA	1983	1497	1339	257	191
Ford & Milosky (2008)	5	0	0	0	1	16	16	4.83	2008	921.307	761.861	268.91	139.69
Ford & Milosky (2008)	5	2	0	0	1	12	16	4.83	2008	122.277	89.92	37.1	14.5
Yang & Gray (2017)	8	0	0	0	0	22	30	4.73	2017	1362.5	1151.2799	274.05	196.31
Yang & Gray (2017)	8	3	0	0	0	22	30	4.73	2017	2717.48	2257.53	515.03	813.58
Yang & Gray (2017)	8	0	0	0	1	22	30	4.73	2017	851.997	785.114	41.75	33.48
Yang & Gray (2017)	8	3	0	0	1	22	30	4.73	2017	1428.21	1274.7	193.95	233.16
Oram Cardy et al. (2010)	9	0	0	0	0	14	28	9.6	2010	689	614	117	125
Victorino & Schwartz (2015)	11	3	1	1	0	20	20	10.83	2015	1045.52	921.17	193.34	235.43
Kuntz (2012)	12	0	0	0	0	17	17	8.5	2012	519.03	457.74	78.89	67.56
Kuntz (2012)	12	0	1	0	0	17	17	8.5	2012	476.1	434.99	60.72	52.92
Kuntz (2012)	12	3	0	1	0	17	17	8.5	2012	1144.02	967.48	122.21	141.16
Kuntz (2012)	12	3	0	1	0	17	17	8.5	2012	1219.21	1061.38	252.08	184.95
Kuntz (2012)	12	3	1	1	0	17	17	8.5	2012	1307.54	1192.61	209.4	223.86
Kuntz (2012)	12	3	1	1	0	17	17	8.5	2012	1146.09	908.59	250.66	143.35
Davidson (1998)	13	0	1	1	0	15	15	10	1998	947	1110	209	235
Davidson (1998)	13	0	1	1	0	15	15	10	1998	944	1136	192	307
Davidson (1998)	13	3	1	1	0	15	15	10	1998	1144	1108	267.2358509	143.3003838
Gelfand (2015)	14	3	0	0	0	12	12	22.74	2015	574.54	574.63	102.25	70.39
Gelfand (2015)	14	3	1	0	0	12	12	22.74	2015	579.15	585.12	145.01	52.86
Gelfand (2015)	14	3	1	0	0	12	12	22.74	2015	602.25	595.47	86.62	111.57
Street (2005)	15	0	0	0	0	15	15	10.833	2005	422	387	84	66
Hanson & Montgomery (2002)	19	0	1	0	0	12	12	8.333	2002	521	439	132.8	118.7
Windsor & Hwang (1999)	24	0	1	0	0	23	23	11.33	1999	348.5	328.2	36	46
Windsor & Hwang (1999)	24	1	1	1	0	23	23	11.33	1999	1127	950	395	152
Garrity (2007)	25	0	1	0	0	10	10	6.46	2007	549.43	514.55	448.71	285.72
Ellis Weismer & Hesketh (1998)	26	0	1	0	0	20	20	8.167	1998	0.606	0.597	0.138	0.098
Ellis Weismer & Hesketh (1996)	28	0	1	0	0	16	16	7.17	1996	0.635	0.568	0.3	0.092
Ellis Weismer & Hesketh (1996)	28	0	1	0	0	16	16	7.17	1996	0.651	0.599	0.224	0.149
Jongman et al. (2017)	31	3	0	0	0	28	22	8.33	2017	574.4285714	547.7727273	88.09356498	93.26507631
Jongman et al. (2017)	31	3	1	0	0	28	22	8.33	2017	676.7142857	656.1363636	127.4228473	124.5362045
Jongman et al. (2017)	31	2	0	0	1	28	22	8.33	2017	970.75	785.2272727	193.989237	109.9007915
Coady (2013)	32	2	0	0	1	20	20	9.66	2013	1333.46	1165.2	430.16	290.5
Kail (1986) Experiment #6	33	2	0	0	1	20	20	NA	1986	713	589	213	103
Miller et al. (2001) NLI	35	0	0	0	0	18	12	9	2001	984	879	200	222
Miller et al. (2001) NLI	35	0	0	0	0	18	12	9	2001	957	793	207	191
Miller et al. (2001) NLI	35	0	0	0	0	18	12	9	2001	1020	848	261	246
Miller et al. (2001) NLI	35	2	0	0	1	18	13	9	2001	1043	967	290	214
Miller et al. (2006) NLI	35	0	0	0	0	15	15.5	13.92	2006	675	528	124	94
Miller et al. (2006) NLI	35	0	0	0	0	15	15.5	13.92	2006	626	478	141	77
Miller et al. (2006) NLI	35	0	0	0	0	15	15.5	13.92	2006	636	497	129	83
Miller et al. (2006) NLI	35	2	0	0	1	15	14	13.92	2006	884	830	234	128
Miller et al. (2001) SLI	35	0	0	0	0	26	12	9	2001	866	879	294	222
Miller et al. (2001) SLI	35	0	0	0	0	26	12	9	2001	840	793	251	191
Miller et al. (2001) SLI	35	0	0	0	0	26	12	9	2001	905	848	315	246
Miller et al. (2001) SLI	35	2	0	0	1	29	13	9	2001	1032	967	207	214
Miller et al. (2006) SLI	35	0	0	0	0	20	15.5	13.92	2006	662	528	159	94
Miller et al. (2006) SLI	35	0	0	0	0	20	15.5	13.92	2006	603	478	159	77
Miller et al. (2006) SLI	35	0	0	0	0	20	15.5	13.92	2006	594	497	159	83
Miller et al. (2006) SLI	35	2	0	0	1	19	14	13.92	2006	891	830	199	128
Lum et al. (2010)	39	0	0	1	0	15	15	7.06	2010	1034.86	1044.08	247.48	191.03
Crosbie et al. (2004) A	40	0	1	0	1	15	15	8.92	2004	752	596	418	132
Crosbie et al. (2004) B	40	1	1	0	1	15	15	8.92	2004	1015	734	440	230
Crosbie et al. (2004) B	40	1	1	0	1	15	15	8.92	2004	843	667	320	163
Crosbie et al. (2004) C	40	1	0	0	1	15	15	8.92	2004	880	673	181	109
Crosbie et al. (2004) C	40	1	0	0	1	15	15	8.92	2004	972	781	253	163
Crosbie et al. (2004) C	40	1	0	0	1	15	15	8.92	2004	899	740	248	153
Crosbie et al. (2004) D	40	1	1	1	1	15	15	8.92	2004	829	592	293	138
Thordardottir et al. (2011)	43	2	0	0	1	14	14	5.0833	2011	137.5	91.56	46.4	35.1
Seiger-Gardner & Brooks (2008)	44	3	1	1	1	18	18	8.58	2008	796	681	165	121
Seiger-Gardner & Brooks (2008)	44	3	1	1	1	18	18	8.58	2008	933	808	233	179
Seiger-Gardner & Brooks (2008)	44	3	1	1	1	18	18	8.58	2008	1050	810	259	211
Seiger-Gardner & Brooks (2008)	44	3	1	1	1	18	18	8.58	2008	888	697	224	192
Seiger-Gardner & Brooks (2008)	44	3	1	1	1	18	18	8.58	2008	997	941	296	428
Seiger-Gardner & Brooks (2008)	44	3	1	1	1	18	18	8.58	2008	1188	954	352	288
Seiger-Gardner (2005)	44	2	0	0	1	14	20	9.25	2005	745.1	692.7	100.73	79.29
Seiger-Gardner (2005)	44	2	0	0	1	14	20	9.25	2005	702.5	694.57	63.78	77.5
Spaulding (2010)	47	0	1	0	0	22	22	4.56	2010	1660	1569	478.78	326.34
Bavin et al. (2005)	48	0	1	0	0	20	20	4.51	2005	1591.05	1365.71	630.46	463.26
Spauling et al. (2008)	52	0	0	0	0	23	23	4.83	2008	2068.48	2017.13	289.34	284.91
Spauling et al. (2008)	52	0	1	0	0	23	23	4.83	2008	1991.52	1835.96	319.35	331.05
Cummings & Ceponiene (2010)	54	1	1	0	0	16	16	11.5	2010	919	948	340	200
Cummings & Ceponiene (2010)	54	1	1	1	0	16	16	11.5	2010	953	956	332	224
Sheng & McGregor (2010)	55	2	1	0	1	10	14	7.33	2010	1337	1286	296	242
Ladanyi & Lukacs (2016)	126	2	0	0	1	13	13	8.83	2016	1095	1087	165	146
Almodovar (2014)	127	3	1	1	1	11	10	8.5	2014	873.71	848.75	256.58	352.16
Almodovar (2014)	127	3	1	1	1	11	10	8.5	2014	910.64	883.85	254.31	378.52
Almodovar (2014)	127	3	1	1	1	11	10	8.5	2014	1004.5	879.98	373.32	196.37
Almodovar (2014)	127	3	1	1	1	11	10	8.5	2014	1040.5	951.5	398.11	289.85
Brooks et al. (2012)	127	3	1	1	1	21	21	8.833	2012	823.762	709.786	134.052	221.594
Brooks et al. (2012)	127	3	1	1	1	21	21	8.833	2012	817.286	712.69	143.162	212.623
Brooks et al. (2012)	127	3	1	1	1	21	21	8.833	2012	852.619	771.857	260.182	275.692
Brooks et al. (2012)	127	3	1	1	1	21	21	8.833	2012	901.071	751.571	193.081	184.831
Brooks et al. (2012)	127	3	1	1	1	21	21	8.833	2012	1022	845.81	281.31	253.533
Brooks et al. (2012)	127	3	1	1	1	21	21	8.833	2012	1044.167	857.119	247.223	223.776
Brooks et al. (2014)	127	3	1	1	1	22	22	8.92	2014	878	791	225	185
Brooks et al. (2014)	127	3	1	1	1	22	22	8.92	2014	924	837	212	196
Brooks et al. (2014)	127	3	1	1	1	22	22	8.92	2014	1109	921	260	227
Brooks et al. (2014)	127	3	1	1	1	22	22	8.92	2014	991	968	223	276
Brooks et al. (2015)	127	3	1	1	1	20	20	8.58	2015	810	775	156	171
Brooks et al. (2015)	127	3	1	1	1	20	20	8.58	2015	903	815	244	210
Brooks et al. (2015)	127	3	1	1	1	20	20	8.58	2015	967	946	242	341
Brooks et al. (2015)	127	3	1	1	1	20	20	8.58	2015	889	1027	324	416
Tropper (2009)	130	3	0	0	0	12	22	11.58	2009	492	481.21	53.81	45.62
Tropper (2009)	130	3	0	0	0	12	22	11.58	2009	516.37	495.1	70.4	46.67
Riddle (1992) B - Older group	160	0	1	0	0	10	10	5.917	1992	689	574	126	76
Riddle (1992) A - Younger group	170	0	1	0	0	10	10	4.33	1992	889	741	226	207
Park et al. (2019) - Monolingual	202	3	0	0	0	17	35	10.19	2019	652	541	137	94
Park et al. (2020) - Monolingual	202	1	0	0	0	17	35	10.19	2020	539	453	133	92
Park et al. (2021) - Monolingual	202	1	0	0	0	28	14	10.27	2021	545	452	137	68
Park et al. (2021) - Monolingual	202	3	0	0	0	28	14	10.27	2021	638	552	134	89
Park et al. (2019) - Bilingual	203	3	0	0	0	9	23	10	2019	651	582	218	114
Park et al. (2020) - Bilingual	203	1	0	0	0	10	24	9.85	2020	524	477	220	109
Park et al. (2021) - Bilingual	203	1	0	0	0	12	12	9.7	2021	470	492	149	124
Park et al. (2021) - Bilingual	203	3	0	0	0	12	12	9.7	2021	630	578	186	101
Ebert (2021) Monolingual	300	1	0	0	0	25	27	7.3	2021	998.02	911.97	224.59	138.76
Ebert et al. (2019) Monolingual	300	3	0	0	0	26	27	7.3	2019	1050.64	1012.163	193.613	166.4765
Ebert (2021) Bilingual	301	1	0	0	0	29	27	7.4	2021	892.9	846.21	141.35	104.06
Ebert et al. (2019) Bilingual	301	3	0	0	0	29	27	7.4	2019	1018.869	942.6188	198.5514	149.4349
Oliveira et al. (2021)	901	2	0	0	1	7	21	8.42	2021	61.86	44.1	6.82	2.13
Oliveira et al. (2021)	901	2	0	1	1	7	21	8.42	2021	36.43	27.43	4.28	1.24
Pizzilo & Schelstraete (2013)	1003	1	1	0	0	13	13	10.0833	2013	768	736	167	112
Velez & Schwartz (2010)	1004	3	1	1	0	13	13	NA	2010	1029	771	216	165
Velez & Schwartz (2010)	1004	3	1	1	0	13	13	NA	2010	1011	810	201	144
Montgomery & Windsor et al. (2007)	9001	0	1	0	0	48	48	8.75	2007	407	350	113.36	85.49
Montgomery (2002)	9001	0	1	0	0	21	21	8.25	2002	385	321	118	75
Montgomery (2005)	9001	0	1	0	0	20	20	8.25	2005	450	375	112	99
Montgomery (2008)	9001	0	1	0	0	36	36	8.5	2008	489	384	104	97
Montgomery & Leonard (1998)	9002	0	1	0	0	21	21	8.5	1998	411	337	125	101
Montgomery (2006)	9003	0	1	0	0	16	16	8.58	2006	396.7	330.1	132.1	78.9
Montgomery & Leonard (2006)	9004	0	1	0	0	16	16	9	2006	375.8	314.7	126.6	91.3
Epstein et al. (2014)	9006	3	0	0	0	12	22	11.42	2014	492	481.21	53.81	45.62
Bahn et al. (2021)	9007	1	0	0	0	26	26	8.2	2021	1013	860	272	183
Bahn et al. (2021)	9007	1	0	0	0	26	26	8.2	2021	1226	1183	321	253
Bahn et al. (2021)	9007	1	1	1	0	26	26	8.2	2021	997	1008	345	382
